# Supplementary material for: Water-stable Cd(ii)/Zn(ii) coordination polymers as recyclable luminescent sensors for detecting hippuric acid in simulated urine for indexing toluene exposure with high selectivity, sensitivity and fast response
Source: Royal Society of Chemistry journal article supplement (doi:10.1039/d0dt03648j), 2020-12-09
Supplement: d0dt03648j1.pdf [file d0dt03648j1.pdf]

## Supporting Information

### Water-stable Cd(II)/Zn(II) coordination polymers as recyclable luminescent sensors for detecting hippuric acid in simulated urine for indexing toluene exposure with high selectivity, sensitivity and fast response

Jiao-Jiao Zhao, Lei Zhang, Peng-Yu Liu, Wei-Zhe Chen, Zhi-Liang Liu and Yan-Qin Wang\*

**Table S1.** Crystallographic data and structure refinements for CPs **1-3**.

| Complex                                               | <b>1</b>                                                          | <b>2</b>                                                                       | <b>3</b>                                                                       |
|-------------------------------------------------------|-------------------------------------------------------------------|--------------------------------------------------------------------------------|--------------------------------------------------------------------------------|
| Empirical formula                                     | C <sub>29</sub> H <sub>21</sub> CdN <sub>7</sub> O <sub>3.5</sub> | C <sub>58</sub> H <sub>40</sub> Zn <sub>2</sub> N <sub>14</sub> O <sub>6</sub> | C <sub>31</sub> H <sub>25</sub> Cd <sub>2</sub> N <sub>7</sub> O <sub>10</sub> |
| Formula weight                                        | 635.93                                                            | 1159.78                                                                        | 880.38                                                                         |
| Temperature/K                                         | 296.15                                                            | 296.15                                                                         | 296.15                                                                         |
| Crystal system                                        | triclinic                                                         | triclinic                                                                      | triclinic                                                                      |
| Space group                                           | <i>P</i> $\bar{1}$                                                | <i>P</i> $\bar{1}$                                                             | <i>P</i> $\bar{1}$                                                             |
| a/Å                                                   | 11.0248(8)                                                        | 12.8324(9)                                                                     | 9.5327(6)                                                                      |
| b/Å                                                   | 13.2191(10)                                                       | 14.0562(9)                                                                     | 10.2308(7)                                                                     |
| c/Å                                                   | 14.1609(11)                                                       | 16.8239(12)                                                                    | 18.6797(12)                                                                    |
| $\alpha$ /°                                           | 117.1500(10)                                                      | 97.0300(10)                                                                    | 82.8490(10)                                                                    |
| $\beta$ /°                                            | 102.4070(10)                                                      | 101.5180(10)                                                                   | 76.5790(10)                                                                    |
| $\gamma$ /°                                           | 100.6180(10)                                                      | 114.7100(10)                                                                   | 73.1260(10)                                                                    |
| Volume/Å <sup>3</sup>                                 | 1696.2(2)                                                         | 2628.0(3)                                                                      | 1692.54(19)                                                                    |
| Z                                                     | 2                                                                 | 2                                                                              | 2                                                                              |
| $\rho_{\text{calcd}}/\text{g cm}^{-3}$                | 1.245                                                             | 1.466                                                                          | 1.727                                                                          |
| $\mu/\text{mm}^{-1}$                                  | 0.681                                                             | 0.980                                                                          | 1.323                                                                          |
| F(000)                                                | 640.0                                                             | 1188.0                                                                         | 872.0                                                                          |
| Reflections collected                                 | 10372                                                             | 16053                                                                          | 10263                                                                          |
| Independent reflections                               | 7438                                                              | 11504                                                                          | 7394                                                                           |
| $R_{\text{int}}$                                      | 0.0216                                                            | 0.0186                                                                         | 0.0114                                                                         |
| Goodness-of-fit on F <sup>2</sup>                     | 0.980                                                             | 1.040                                                                          | 1.043                                                                          |
| R <sub>1</sub> , wR <sub>2</sub> [I > 2 $\sigma$ (I)] | R <sub>1</sub> = 0.0387<br>wR <sub>2</sub> = 0.0886               | R <sub>1</sub> = 0.0400<br>wR <sub>2</sub> = 0.0937                            | R <sub>1</sub> = 0.0262<br>wR <sub>2</sub> = 0.0642                            |
| R <sub>1</sub> , wR <sub>2</sub> (all data)           | R <sub>1</sub> = 0.0550<br>wR <sub>2</sub> = 0.0952               | R <sub>1</sub> = 0.0658<br>wR <sub>2</sub> = 0.1033                            | R <sub>1</sub> = 0.0318<br>wR <sub>2</sub> = 0.0666                            |

**Table S2.** The selected bond lengths (Å) and angles (°) for CPs **1-3**.

| <b>1</b>                                                                                                         |            |             |            |
|------------------------------------------------------------------------------------------------------------------|------------|-------------|------------|
| Cd1-O1                                                                                                           | 2.398(2)   | Cd1-O2      | 2.320(2)   |
| Cd1-O3                                                                                                           | 2.347(2)   | Cd1-N1      | 2.281(2)   |
| Cd1-N3C                                                                                                          | 2.330(2)   | Cd1-N4B     | 2.318(3)   |
| O2-Cd1-O1                                                                                                        | 55.13(7)   | O3-Cd1-O1   | 87.17(8)   |
| O2-Cd1-O3                                                                                                        | 94.56(9)   | N1-Cd1-N3C  | 111.34(9)  |
| N1-Cd1-N4B                                                                                                       | 86.21(9)   | N4B-Cd1-N3C | 92.02(9)   |
| N1-Cd1-O1                                                                                                        | 105.21(8)  | N3C-Cd1-O1  | 141.57(8)  |
| N4B-Cd1-O1                                                                                                       | 101.99(8)  | N1-Cd1-O2   | 160.34(8)  |
| O2-Cd1-N3C                                                                                                       | 87.95(8)   | O2-Cd1-N4B  | 97.25(9)   |
| N1-Cd1-O3                                                                                                        | 83.64(9)   | N3C-Cd1-O3  | 85.47(9)   |
| N4B-Cd1-O3                                                                                                       | 167.83(8)  |             |            |
| Symmetry transformations used to generate equivalent atoms: A: -x, 1-y, -1-z; B: +x, +y, -1+z; C: +x, 1+y, +z.   |            |             |            |
| <b>2</b>                                                                                                         |            |             |            |
| Zn2-O4                                                                                                           | 2.001(2)   | Zn2-N8      | 2.017(2)   |
| Zn2-N12A                                                                                                         | 2.058(2)   | Zn2-N14B    | 2.082(2)   |
| Zn2-O3                                                                                                           | 2.401(2)   | Zn1-O2      | 1.9249(18) |
| Zn1-N4B                                                                                                          | 2.029(2)   | Zn1-N7      | 2.027(2)   |
| Zn1-N5C                                                                                                          | 2.047(2)   | O4-Zn2-N8   | 128.08(8)  |
| O4-Zn2-N12A                                                                                                      | 118.70(9)  | N8-Zn2-N12A | 102.88(8)  |
| O4-Zn2-N14B                                                                                                      | 95.18(8)   | N8-Zn2-N14B | 99.41(8)   |
| N12A-Zn2-N14B                                                                                                    | 109.03(8)  | O4-Zn2-O3   | 58.59(8)   |
| N8-Zn2-O3                                                                                                        | 94.93(8)   | N12A-Zn2-O3 | 89.15(8)   |
| N14B-Zn2-O3                                                                                                      | 153.47(8)  | O2-Zn1-N4B  | 112.53(8)  |
| O2-Zn1-N7                                                                                                        | 119.09(9)  | N4B-Zn1-N7  | 103.07(8)  |
| O2-Zn1-N5C                                                                                                       | 108.45(9)  | N4B-Zn1-N5C | 100.12(8)  |
| N7-Zn1-N5C                                                                                                       | 111.89(8)  |             |            |
| Symmetry transformations used to generate equivalent atoms: A: +x, -1+y, +z; B: -1+x, -1+y, +z; C: -1+x, +y, +z. |            |             |            |
| <b>3</b>                                                                                                         |            |             |            |
| Cd1-O4                                                                                                           | 2.1870(18) | Cd1-O2A     | 2.2458(19) |
| Cd1-N7B                                                                                                          | 2.321(2)   | Cd1-N3C     | 2.335(2)   |
| Cd1-O5D                                                                                                          | 2.3782(18) | Cd2-N1      | 2.256(2)   |
| Cd1-O1A                                                                                                          | 2.5285(19) | Cd2-O6      | 2.2811(18) |
| Cd2-O7                                                                                                           | 2.258(3)   | Cd2-O3D     | 2.425(2)   |
| Cd2-N6E                                                                                                          | 2.306(2)   | Cd2-O5      | 2.5252(18) |
| O4-Cd1-N7B                                                                                                       | 122.70(8)  | O4-Cd1-O2A  | 139.95(7)  |
| O4-Cd1-N3C                                                                                                       | 90.34(8)   | O2A-Cd1-N7B | 94.89(8)   |
| N7B-Cd1-N3C                                                                                                      | 85.43(8)   | O2A-Cd1-N3C | 107.37(8)  |
| O4-Cd1-O5D                                                                                                       | 82.01(7)   | O2A-Cd1-O5D | 88.75(7)   |
| N7B-Cd1-O5D                                                                                                      | 84.96(7)   | N3C-Cd1-O5D | 161.87(7)  |

|             |           |             |            |
|-------------|-----------|-------------|------------|
| O4-Cd1-O1A  | 91.50(7)  | O2A-Cd1-O1A | 54.32(7)   |
| N7B-Cd1-O1A | 145.33(7) | N3C-Cd1-O1A | 89.21(8)   |
| O5D-Cd1-O1A | 107.31(7) | N1-Cd2-O7   | 97.56(10)  |
| N1-Cd2-O6   | 126.57(8) | O7-Cd2-O6   | 86.74(10)  |
| N1-Cd2-N6E  | 94.17(8)  | O7-Cd2-N6E  | 102.66(13) |
| O6-Cd2-N6E  | 136.94(7) | N1-Cd2-O3D  | 91.59(8)   |
| O7-Cd2-O3D  | 166.62(9) | O6-Cd2-O3D  | 79.96(7)   |
| N6E-Cd2-O3D | 86.31(8)  | N1-Cd2-O5   | 176.69(7)  |
| O7-Cd2-O5   | 85.61(9)  | O6-Cd2-O5   | 54.37(6)   |
| N6E-Cd2-O5  | 84.17(7)  | O3D-Cd2-O5  | 85.45(6)   |

Symmetry transformations used to generate equivalent atoms: A: 1+x, 1+y, +z; B: 1-x, 2-y, 2-z; C: -1+x, +y, 1+z; D: -x, 1-y, 2-z; E: -1+x, -1+y, +z.

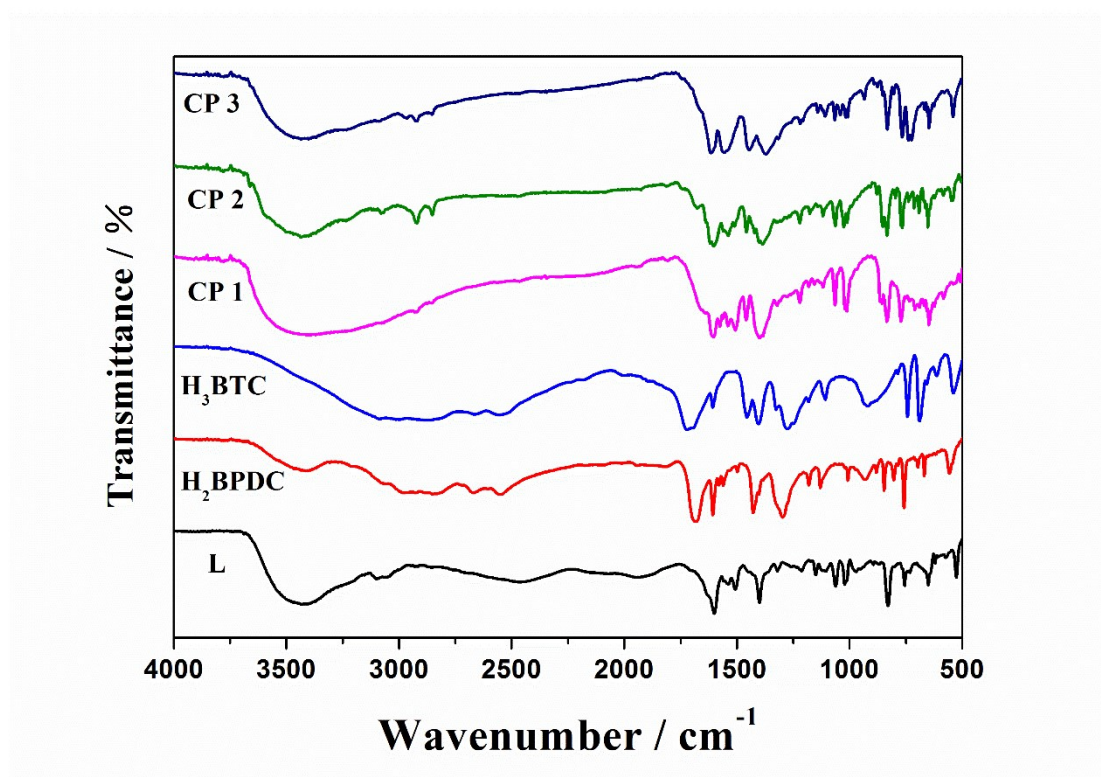

Fig. S1 The IR spectra of three ligands and CPs 1-3.

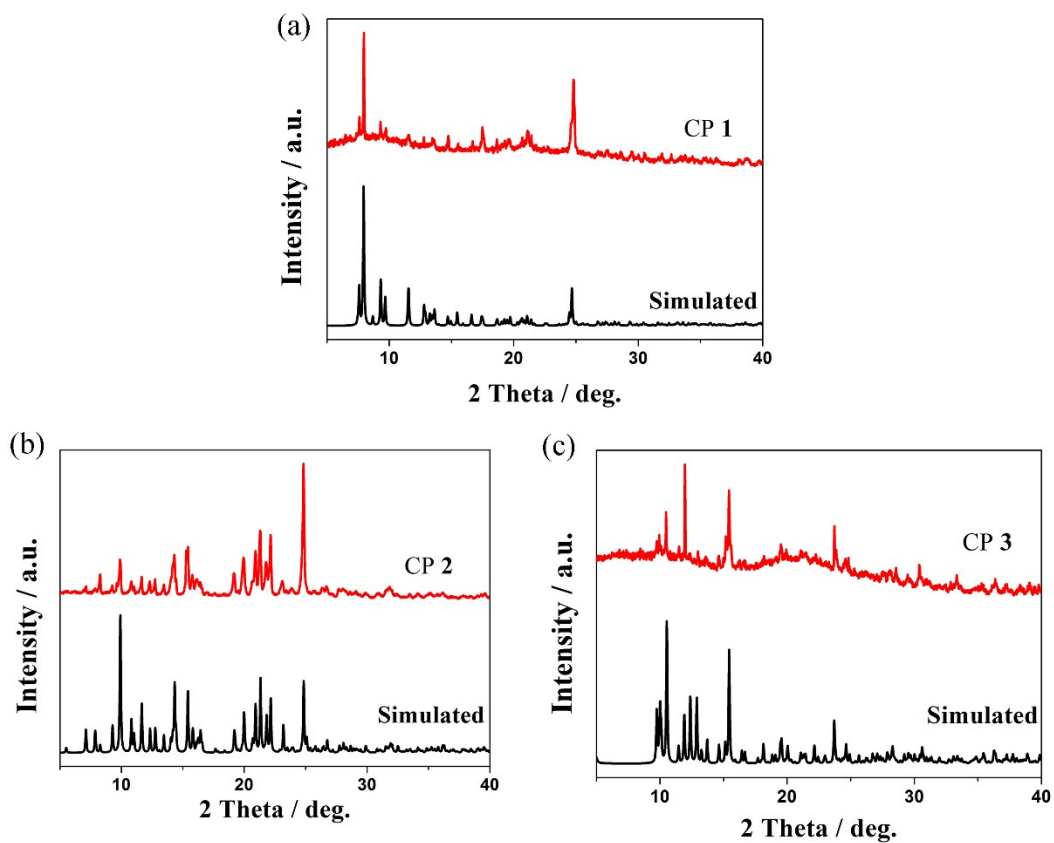

Fig. S2 The PXR patterns for CPs 1-3.

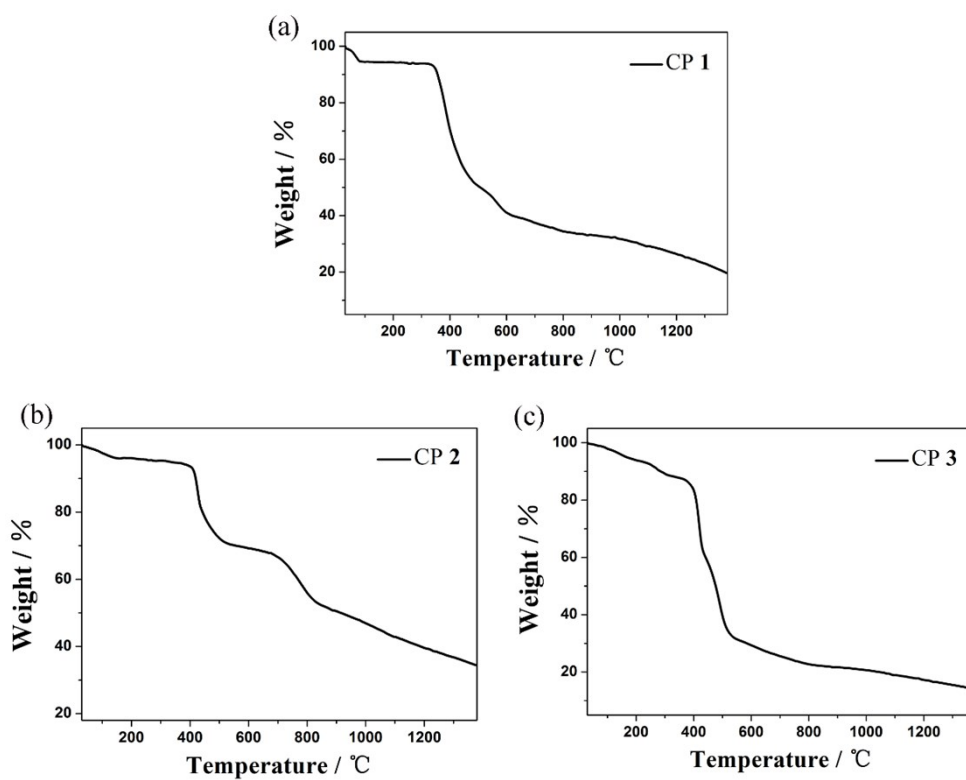

Fig. S3 The TGA curves for CPs 1-3.

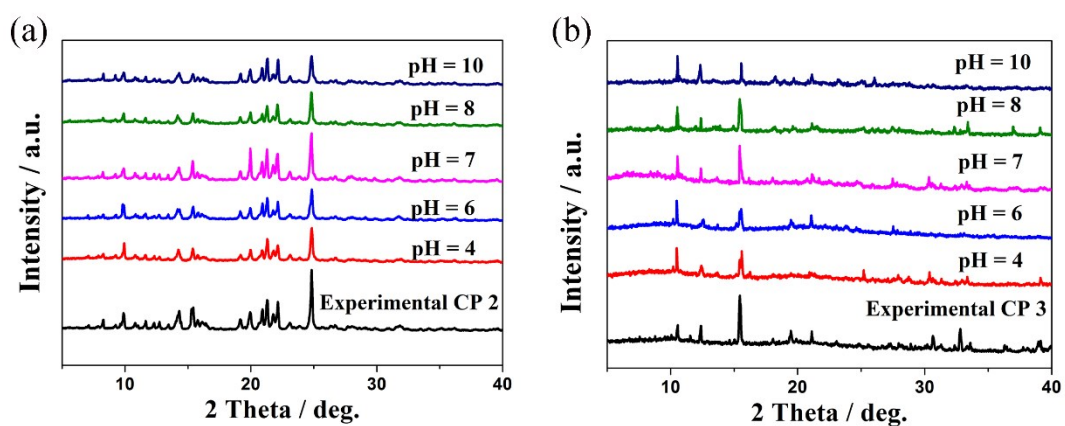

Fig. S4 PXRD patterns of ground samples of CP 2 and CP 3 under different pH conditions for 24 h.

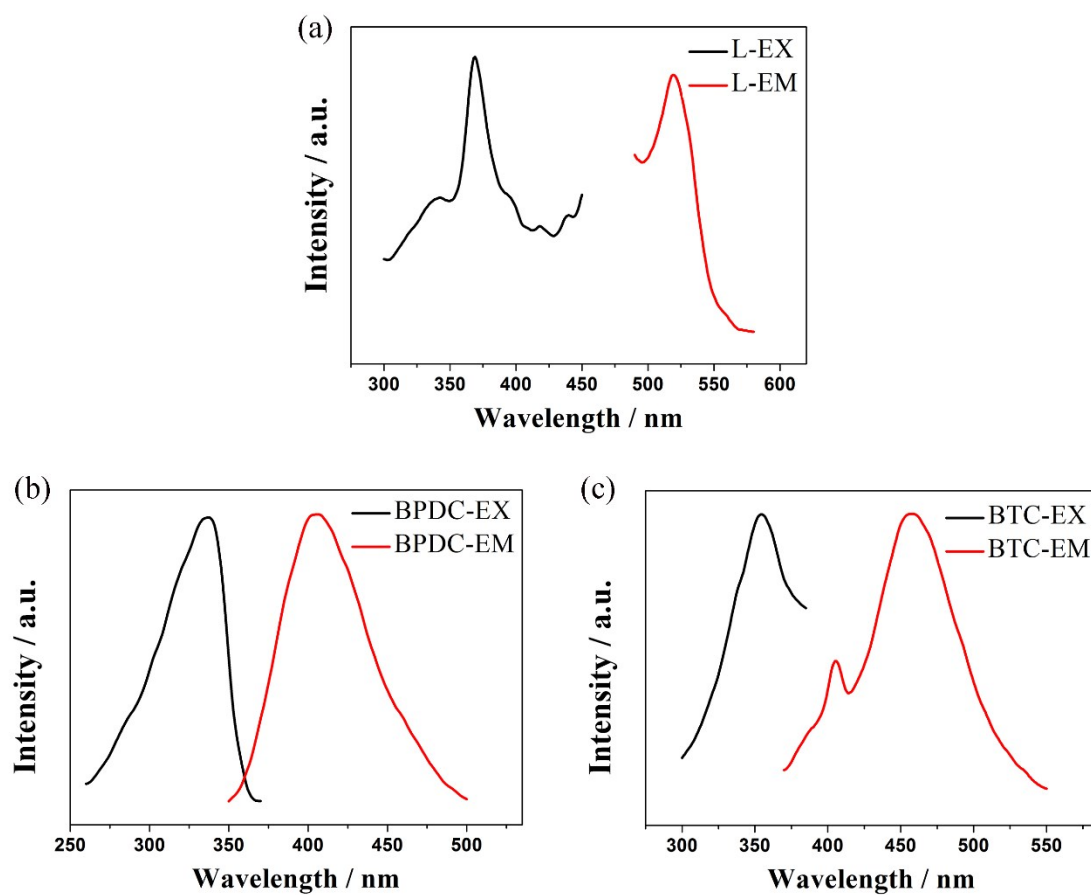

Fig. S5 The solid-state excitation and emission spectra of free L, BPDC and BTC ligands at room temperature.

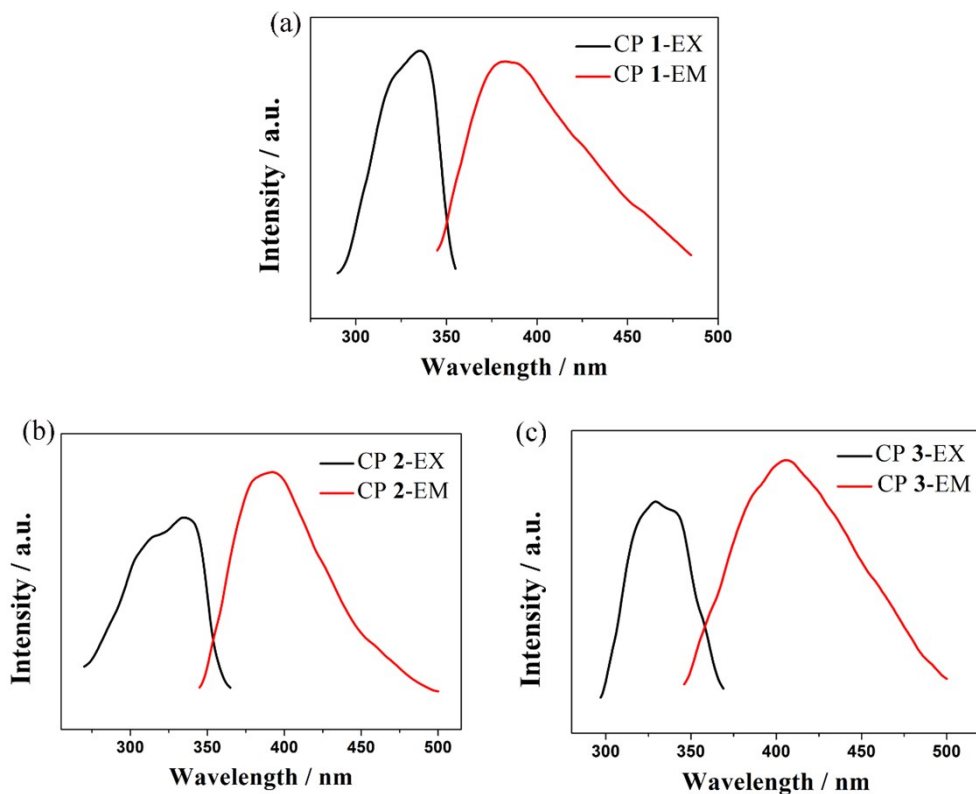

Fig. S6 The solid-state excitation and emission spectra of CPs 1-3 at room temperature.

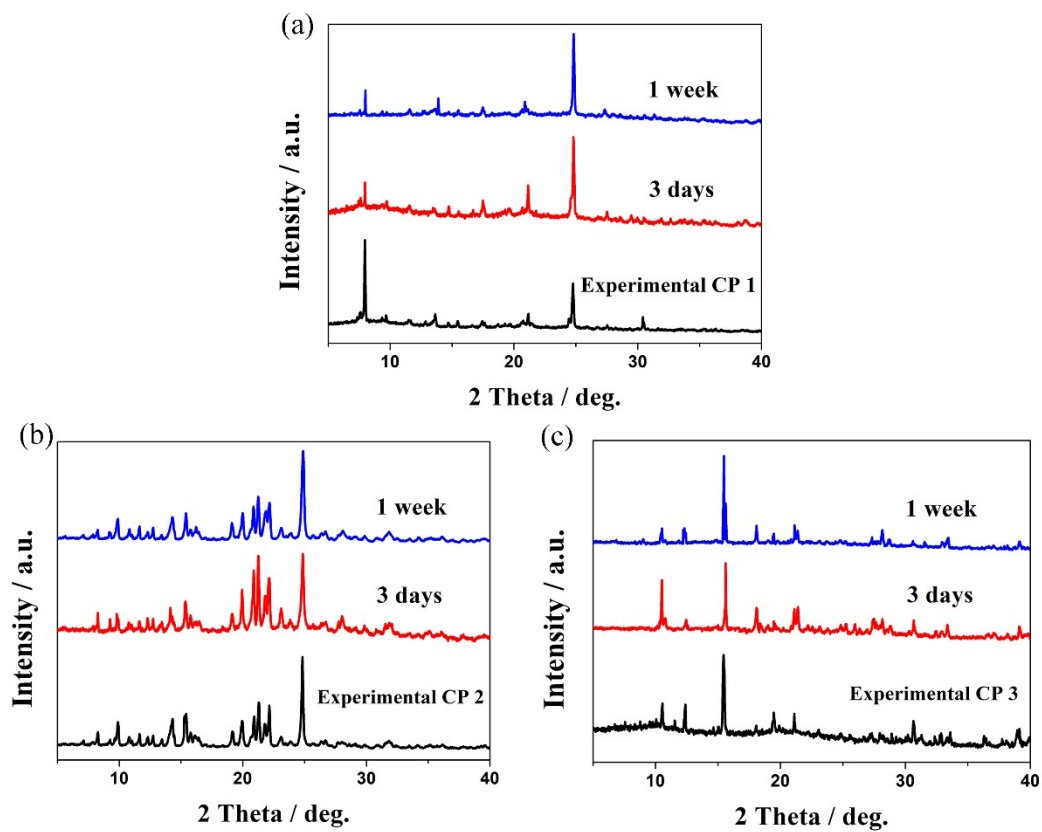

Fig. S7 PXRD patterns of CPs 1-3 after immersing in water for three days and one week.

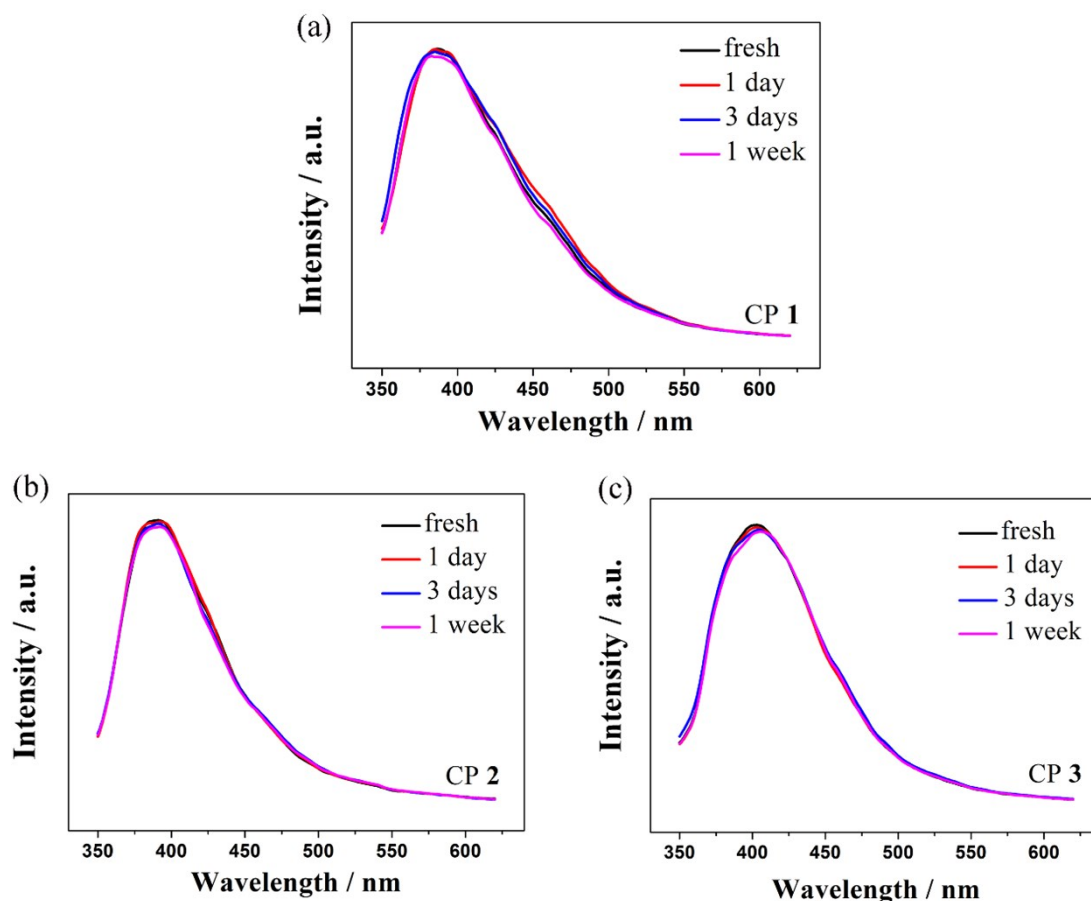

Fig. S8 Day-to-day fluorescence stability of CPs 1-3.

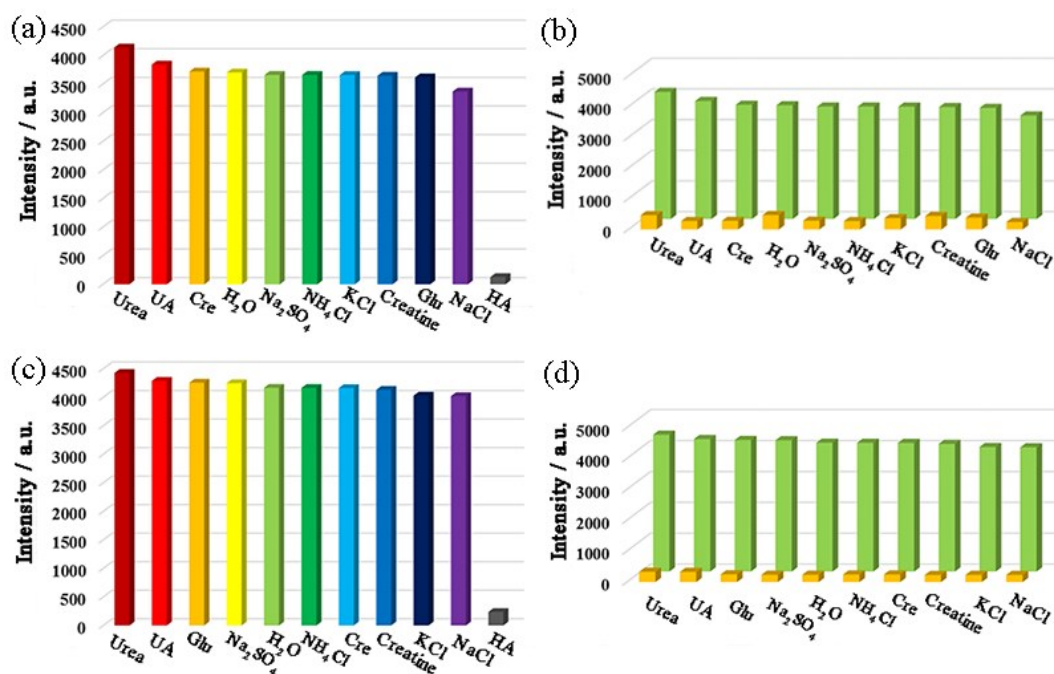

Fig. S9 Luminescence intensities of CP 2 (a) and CP 3 (c) dispersed in the routine urine chemicals upon excitation at 335 and 330 nm, respectively. Luminescence intensities of CP 2 (b) and CP 3 (d) upon the addition of HA (orange) in the background of other interferences (green).

**Table S3.** Comparison of the analytical parameters of previously reported sensors with CPs 1-3.

| Material                           | Method                    | LOD ( $\mu\text{g mL}^{-1}$ ) | Reusability | Ref       |
|------------------------------------|---------------------------|-------------------------------|-------------|-----------|
| Diflunisal electrode               | Potentiometric ion sensor | 63                            | -           | 1         |
| Capillary column                   | Gas Chromatography        | 4.6                           | +           | 2         |
| MIL-121@Eu <sup>3+</sup>           | Fluorescent sensor        | 9                             | +           | 3         |
| MIL-124@Eu <sup>3+</sup>           | Fluorescent sensor        | 8.1                           | +           | 4         |
| CC[4]A@MIL-53-NH <sub>2</sub> (Al) | Fluorescent sensor        | 3.7                           | +           | 5         |
| CP 1                               | Fluorescent sensor        | 3.2                           | +           | This work |
| CP 2                               | Fluorescent sensor        | 4                             | +           | This work |
| CP 3                               | Fluorescent sensor        | 5                             | +           | This work |

H<sub>4</sub>btec = 1,2,4,5-benzenetetracarboxylic acid;<sup>3</sup> 1,2,4-H<sub>3</sub>btc = 1,2,4-benzenetricarboxylate;<sup>4</sup> NH<sub>2</sub>-BDC = 2-Amino-1,4-benzenedicarboxylic acid.<sup>5</sup>

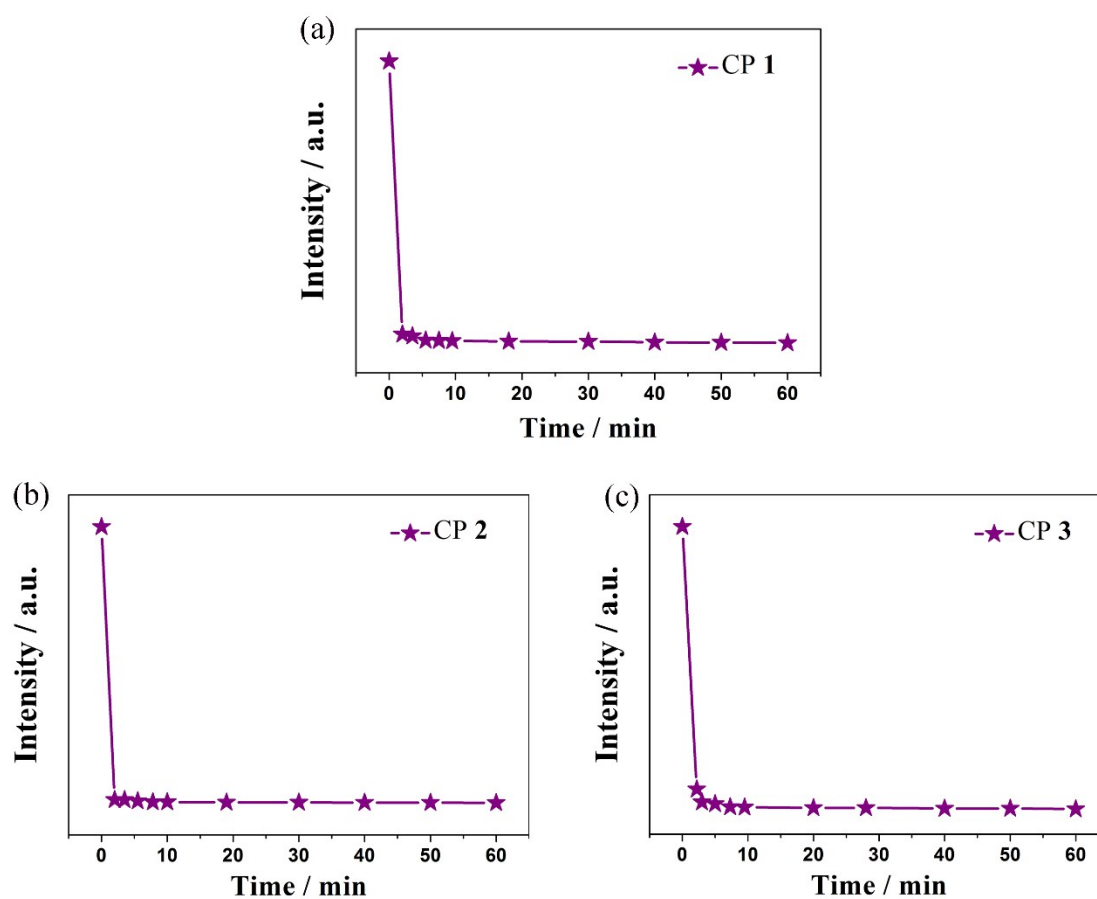

**Fig. S10** Time-dependent fluorescence intensities of CPs 1-3 upon addition of HA aqueous solution.



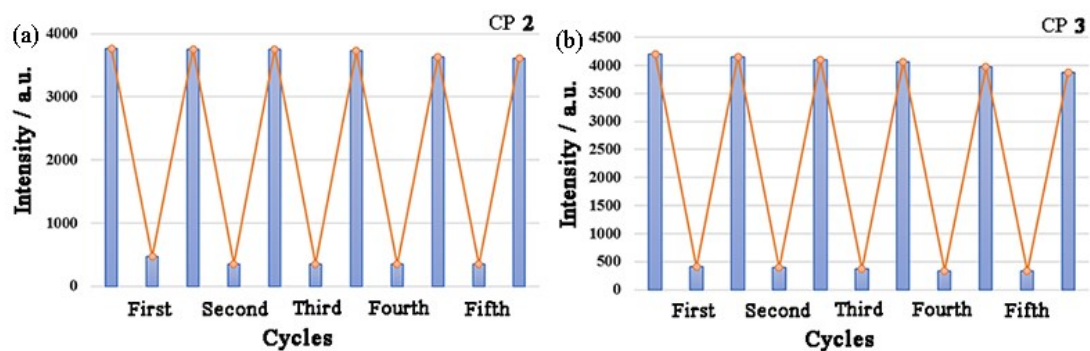

Fig. S11 Five cycles test of CP 2 and CP 3 towards sensing HA.

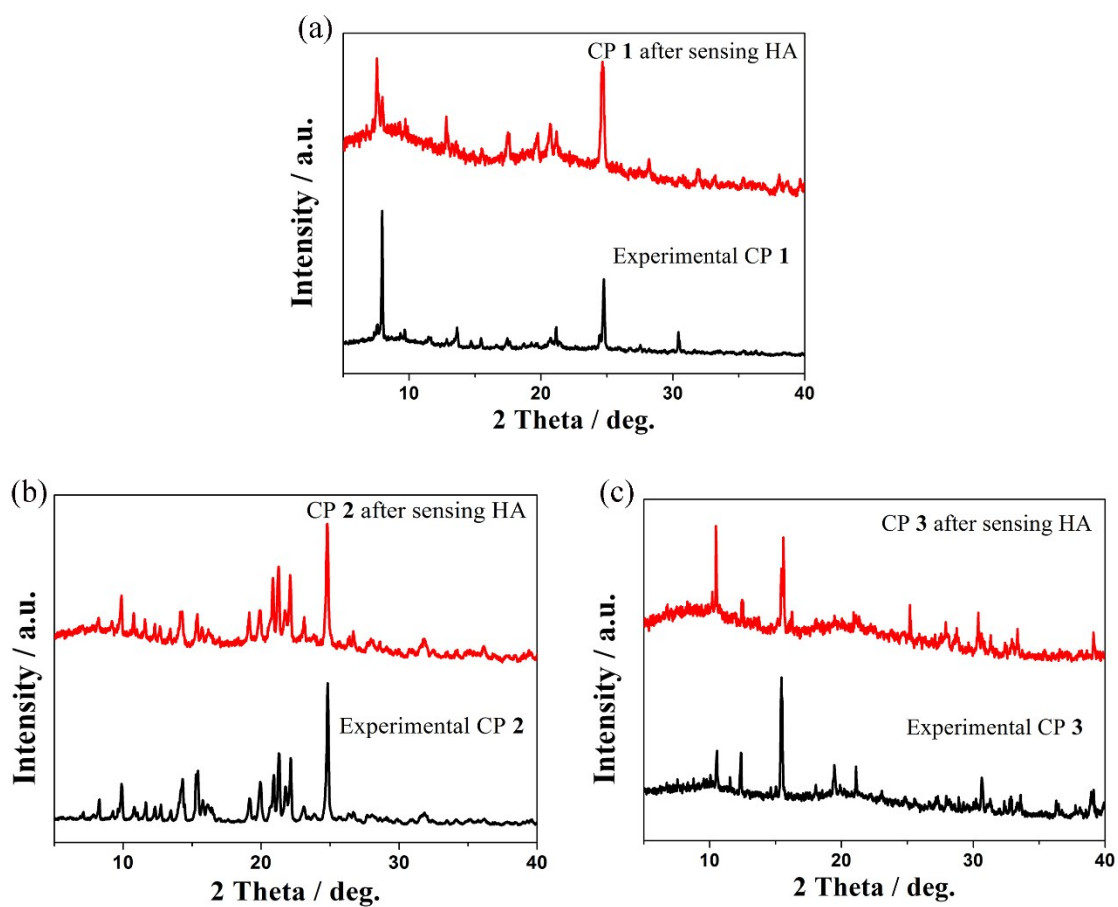

Fig. S12 PXRD patterns of CPs 1-3 and CPs 1-3 immersed in HA aqueous solution.

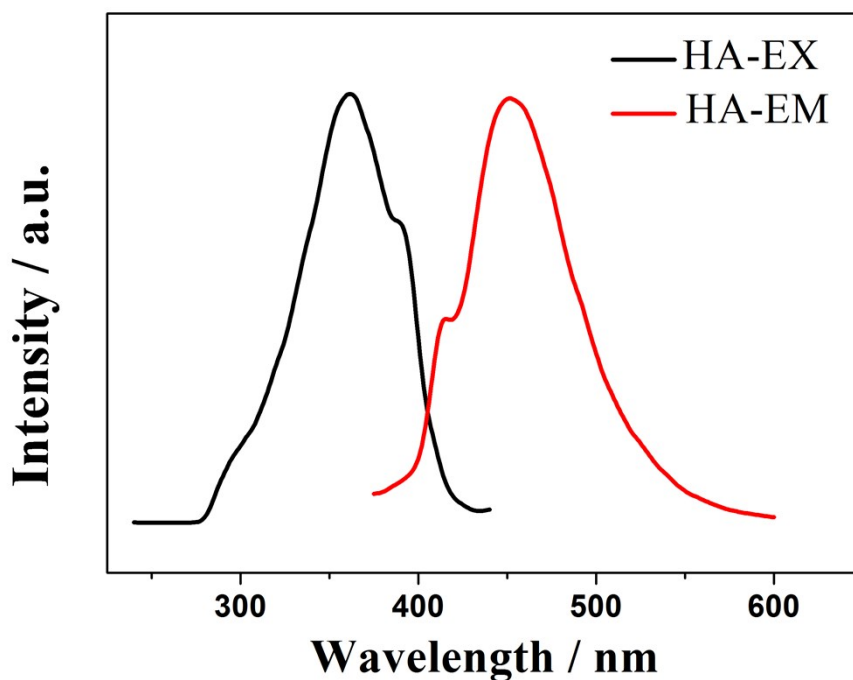

Fig. S13 Excitation (black line) and emission spectra (red line) of HA.

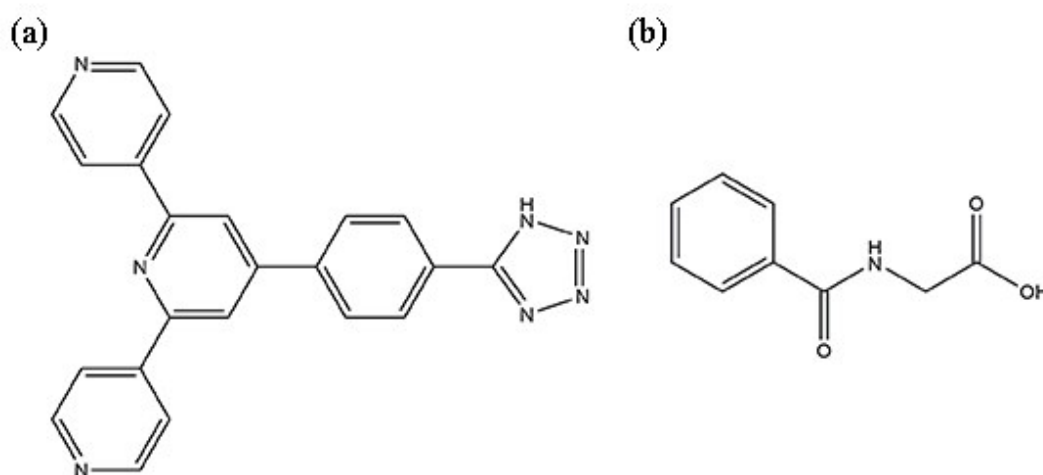

Fig. S14 The structural formulas of ligand and hippuric acid.

- 1 A. Davilas, M. Koupparis, P. Macheras and G. Valsami, In-vitro study on the competitive binding of diflunisal and uraemic toxins to serum albumin and human plasma using a potentiometric ion-probe technique, *J. Pharm. Pharmacol.*, 2006, **58**, 1467.
- 2 F. Cosnier, H. Nunge, B. Cossec and L. Gate, Simultaneous Determination of Aromatic Acid Metabolites of Styrene and Styrene-Oxide in Rat Urine by Gas Chromatography–Flame Ionization Detection, *J. Anal. Toxicol.*, 2012, **36**, 312.
- 3 J. N. Hao and B. Yan, Recyclable lanthanide-functionalized MOF hybrids to determine hippuric acid in urine as a biological index of toluene exposure, *Chem. Commun.*, 2015, **51**,

14509.

- 4 S. J. Qin, J. N. Hao, X. Y. Xu, X. Lian and B. Yan, Highly sensing probe for biological metabolite of benzene series pollutants based on recyclable  $\text{Eu}^{3+}$  functionalized metal-organic frameworks hybrids, *Sens. Actuators, B*, 2017, **253**, 852.
- 5 Y. Du, X. Li, H. Zheng, X. Lv and Q. Jia, Design of a calix[4]arene-functionalized metal-organic framework probe for highly sensitive and selective monitor of hippuric acid for indexing toluene exposure, *Anal. Chim. Acta.*, 2018, **1001**, 134.
